# Supplementary material for: Reintroducing and testing the Probabilistic Sliding Template Model of vowel perception
Source: publisher site journal article supplement (doi:10.1515/lingvan-2024-0239), 2025-09-29
Supplement: Supplementary file 1 [file _The_STM_R_Package.pdf › _The_STM_R_Package.pdf]

# The STM R package

Santiago Barreda and T. Florian Jaeger

## Introduction

This package is meant to facilitate the simulation of vowel perception and the creation of related visualizations. First install the package if necessary, and load it. The finalized version of the package will be available on CRAN, it is only on GitHub for now.

## Examples of Usage

### Data setup

We load the STM package and the h95\_data (Hillenbrand et al. 1995, henceforth H95) dataset. This is the complete data asociated with the H95 paper that was once hosted on James Hillenbrand's academic website, now down (and distributed with his permission). The data loaded below contains: formant data at a 'stable part' of the vowel, formant values at different time points, listener classifications for each judgement, and two estimates of  $\hat{\psi}_s$ : psi\_1 (based on the stable part of the formants) and psi\_2 (based on measurements at 20% and 80%).

```
library (STM)
data (h95_data)
head (h95_data)
```

|     | file  | dur  | f0   | f1   | f2   | f3   | f1_1 | f2_1 | f3_1 | f1_2 | f2_2 | f3_2 | f1_3 | f2_3 | f3_3 |
|-----|-------|------|------|------|------|------|------|------|------|------|------|------|------|------|------|
| 1   | b01ae | 257  | 238  | 630  | 2423 | 3166 | 625  | 2388 | 3174 | 651  | 2413 | 3115 | 675  | 2463 | 3011 |
| 140 | b01ah | 212  | 241  | 831  | 1676 | 2602 | 820  | 1688 | 2511 | 845  | 1684 | 2583 | 845  | 1681 | 2606 |
| 279 | b01aw | 242  | 247  | 725  | 1384 | 2642 | 722  | 1411 | 2669 | 725  | 1384 | 2642 | 733  | 1384 | 2662 |
| 418 | b01eh | 184  | 214  | 713  | 2095 | 3129 | 611  | 2121 | 3242 | 643  | 2071 | 3078 | 672  | 2079 | 3120 |
| 557 | b01ei | 222  | 230  | 534  | 2690 | 3335 | 582  | 2454 | 3223 | 621  | 2573 | 3260 | 579  | 2632 | 3287 |
| 696 | b01er | 227  | 240  | 608  | 1733 | 2159 | 567  | 1599 | 2255 | 566  | 1664 | 2180 | 579  | 1709 | 2168 |
|     | f1_4  | f2_4 | f3_4 | f1_5 | f2_5 | f3_5 | f1_6 | f2_6 | f3_6 | f1_7 | f2_7 | f3_7 | f1_8 | f2_8 | f3_8 |
| 1   | 687   | 2391 | 2926 | 683  | 2295 | 2888 | 696  | 2187 | 2888 | 793  | 2074 | 2866 | 806  | 2049 | 2961 |
| 140 | 858   | 1690 | 2600 | 863  | 1696 | 2576 | 875  | 1745 | 2569 | 845  | 1858 | 2657 | 807  | 1980 | 2893 |
| 279 | 731   | 1385 | 2681 | 748  | 1388 | 2682 | 758  | 1458 | 2690 | 772  | 1579 | 2739 | 805  | 1699 | 2777 |
| 418 | 700   | 2109 | 3162 | 703  | 2079 | 3044 | 682  | 2133 | 3092 | 687  | 2124 | 3119 | 672  | 2140 | 3128 |
| 557 | 534   | 2690 | 3335 | 498  | 2797 | 3299 | 480  | 2883 | 3294 | 455  | 2956 | NA   | 440  | 3012 |      |

```

3318
696 635 1746 2103 644 1678 2046 634 1672 2054 633 1778 2078 623 1781
2157
      type speaker vowel ipa correct      psi_1      psi_2 ae ah aw eh ei er ih iy
oa
1      b      b01      ae      æ      95 7.317269 7.315179 19 0 0 1 0 0 0 0
0
140    b      b01      ah      ɑ      95 7.317269 7.315179 0 19 0 0 0 0 0 0
0
279    b      b01      aw      ɔ      10 7.317269 7.315179 0 9 2 0 0 0 0 0
0
418    b      b01      eh      ε      100 7.317269 7.315179 0 0 0 20 0 0 0 0
0
557    b      b01      ei      e      100 7.317269 7.315179 0 0 0 0 20 0 0 0
0
696    b      b01      er      ɜ      100 7.317269 7.315179 0 0 0 0 0 20 0 0
0
      oo uh uw vote
1      0 0 0      ae
140    1 0 0      ah
279    0 9 0      ah
418    0 0 0      eh
557    0 0 0      ei
696    0 0 0      er

```

We first impute missing values in the formant data using the `impute_NA` function. This function uses a linear model to impute, and optionally adds error to estimates (not used here but useful when using resampling methods bootstrapping).

```

h95_data[,c(10:12,28:30)] =
  impute_NA (log(h95_data[,c(10:12,28:30)]), h95_data$speaker,
h95_data$vowel)

```

We will focus on the 20% and 80% time points, for the first 3 formants. We collect the formants, `f0`, `psis`, classification information, and category names.

```

ffs = log(h95_data[,c(10:12,28:30)])
f0s = log(h95_data[,3])
psis = h95_data$psi_2

data(h95_classifications)
classifications = h95_classifications
vs = colnames(classifications)

```

We normalize the log-transformed formant data using the `normalize` function, which employs the regression-based method of log-mean normalization outlined in Barreda and Nearey (2018).

```

nffs = normalize (h95_data[,c(10:12,28:30)],h95_data$speaker,h95_data$vowel)

```

And calculate templates for the dialect based on the available data. Templates contains category means, covariance matrices, and precision matrices.

```
template = create_template (ffs-psis, h95_data$vowel, shared_covar = FALSE)
```

## Example Analysis

If  $\psi_s$  is known, formants may be normalized as usual and the STM function may be used. In addition, this function may be used on templates trained on unnormalized data for classification without normalization. The STM function calculates posterior probabilities for each category based on the template and token acoustic properties. It returns a matrix of posterior probabilities, one row for each observation and one column for each candidate category.

```
STM (nffs[1,1:6], template = template)
```

This function works by calculating the log density of the formant vector for each category, and then calculating posteriors based on these densities. `correctOUflow.internal` is a function that changes 0 and 1 to `.Machine$double.xmin` and `.9999999` respectively, in order to avoid problems when calculating the log likelihood.

STM

```
function (formants, template, vowel_priors = NULL, correctOUflow = TRUE)
{
  n_samples = nrow(formants)
  n_classes = nrow(template$means)
  log_vowel_density = matrix(0, n_samples, n_classes)
  for (j in 1:n_classes) {
    log_vowel_density[, j] = dmvnorm_fast(formants, template$means[j,
    ], template$covariance[[j]], log = TRUE)
  }
  log_vowel_density = log_vowel_density - apply(log_vowel_density,
    1, function(x) mean(x))
  if (!is.null(vowel_priors))
    log_vowel_density = sweep(log_vowel_density, 2, log(vowel_priors),
    `+`)
  vowel_densities = exp(log_vowel_density)
  posterior_probabilities = vowel_densities/rowSums(vowel_densities)
  if (correctOUflow)
    posterior_probabilities =
correctOUflow_internal(posterior_probabilities)
  colnames(posterior_probabilities) = rownames(template$means)
  posterior_probabilities = STM_posteriors(posterior_probabilities)
  return(posterior_probabilities)
}
<bytecode: 0x000002c761219a48>
<environment: namespace:STM>
```

The BSTM function takes in a formant vector, an (optional depending on the method) f0 value, and a dialectal template. It returns information regarding the posterior probabilities for each category, the likelihoods, and the priors.

```
BSTM (ffs[1,],f0s[1], template = template)
```

|    | posterior_mu  | posterior_sd  | posterior_density  | posterior_probability | rounded_pp |
|----|---------------|---------------|--------------------|-----------------------|------------|
| ae | 7.296         | 0.024         | 2.826              | 0.996                 | 0.996      |
| ah | 7.395         | 0.028         | -24.474            | 0.000                 | 0.000      |
| aw | 7.489         | 0.030         | -58.967            | 0.000                 | 0.000      |
| eh | 7.330         | 0.024         | -2.693             | 0.004                 | 0.004      |
| ei | 7.354         | 0.026         | -26.650            | 0.000                 | 0.000      |
| er | 7.541         | 0.031         | -25.733            | 0.000                 | 0.000      |
| ih | 7.350         | 0.022         | -9.490             | 0.000                 | 0.000      |
| iy | 7.262         | 0.030         | -63.778            | 0.000                 | 0.000      |
| oa | 7.464         | 0.029         | -33.754            | 0.000                 | 0.000      |
| oo | 7.406         | 0.026         | -20.620            | 0.000                 | 0.000      |
| uh | 7.392         | 0.024         | -21.023            | 0.000                 | 0.000      |
| uw | 7.457         | 0.031         | -17.017            | 0.000                 | 0.000      |
|    | likelihood_mu | likelihood_sd | likelihood_density | prior_mu              | prior_sd   |
| ae | 7.287         | 0.026         | 11.044             | 7.338                 | 0.056      |
| ah | 7.415         | 0.033         | -15.894            | 7.338                 | 0.056      |
| aw | 7.549         | 0.035         | -45.966            | 7.338                 | 0.056      |
| eh | 7.328         | 0.027         | 5.197              | 7.338                 | 0.056      |
| ei | 7.358         | 0.029         | -18.722            | 7.338                 | 0.056      |
| er | 7.634         | 0.038         | -8.187             | 7.338                 | 0.056      |
| ih | 7.352         | 0.024         | -1.587             | 7.338                 | 0.056      |
| iy | 7.231         | 0.036         | -54.588            | 7.338                 | 0.056      |
| oa | 7.512         | 0.035         | -22.356            | 7.338                 | 0.056      |
| oo | 7.425         | 0.029         | -11.789            | 7.338                 | 0.056      |
| uh | 7.404         | 0.027         | -12.570            | 7.338                 | 0.056      |
| uw | 7.508         | 0.037         | -5.889             | 7.338                 | 0.056      |
|    | prior_density |               |                    |                       |            |
| ae | 1.822         |               |                    |                       |            |
| ah | 1.822         |               |                    |                       |            |
| aw | 1.822         |               |                    |                       |            |
| eh | 1.822         |               |                    |                       |            |

|    |       |
|----|-------|
| ei | 1.822 |
| er | 1.822 |
| ih | 1.822 |
| iy | 1.822 |
| oa | 1.822 |
| oo | 1.822 |
| uh | 1.822 |
| uw | 1.822 |

Alternatively, the function can be run on a matrix of formant vectors, and a vector of f0 values. In this case, a list of results is returned as an `STM_output_list` object.

```
analysis = BSTM (ffs[1:5,],f0s[1:5], template = template)
```

```
analysis
```

STM\_output\_list object with the following elements:

\$list: a list of 5 STM\_output objects

\$winners: a data frame of the winning psi and vowel for each token

\$posterior: a data frame of the posterior probabilities for each token

Below, we show the results for the fifth observation in the dataset.

```
analysis[[5]]
```

|            | posterior_mu | posterior_sd | posterior_density | posterior_probability |
|------------|--------------|--------------|-------------------|-----------------------|
| rounded_pp |              |              |                   |                       |
| ae         | 7.311        | 0.024        | -31.228           | 0.000                 |
| 0.000      |              |              |                   |                       |
| ah         | 7.357        | 0.028        | -58.905           | 0.000                 |
| 0.000      |              |              |                   |                       |
| aw         | 7.406        | 0.030        | -75.977           | 0.000                 |
| 0.000      |              |              |                   |                       |
| eh         | 7.290        | 0.024        | -25.085           | 0.000                 |
| 0.000      |              |              |                   |                       |
| ei         | 7.327        | 0.026        | 2.728             | 1.000                 |
| 1.000      |              |              |                   |                       |
| er         | 7.489        | 0.031        | -27.010           | 0.000                 |
| 0.000      |              |              |                   |                       |
| ih         | 7.347        | 0.022        | -19.607           | 0.000                 |
| 0.000      |              |              |                   |                       |
| iy         | 7.338        | 0.030        | -15.008           | 0.000                 |
| 0.000      |              |              |                   |                       |
| oa         | 7.420        | 0.029        | -68.827           | 0.000                 |
| 0.000      |              |              |                   |                       |
| oo         | 7.420        | 0.026        | -32.553           | 0.000                 |
| 0.000      |              |              |                   |                       |
| uh         | 7.414        | 0.024        | -35.136           | 0.000                 |
| 0.000      |              |              |                   |                       |

|       |               |               |                    |          |          |
|-------|---------------|---------------|--------------------|----------|----------|
| uw    | 7.460         | 0.031         | -21.367            |          | 0.000    |
| 0.000 |               |               |                    |          |          |
|       | likelihood_mu | likelihood_sd | likelihood_density | prior_mu | prior_sd |
| ae    | 7.307         | 0.026         | -25.799            | 7.325    | 0.056    |
| ah    | 7.369         | 0.033         | -53.289            | 7.325    | 0.056    |
| aw    | 7.439         | 0.035         | -69.108            | 7.325    | 0.056    |
| eh    | 7.282         | 0.027         | -19.458            | 7.325    | 0.056    |
| ei    | 7.327         | 0.029         | 8.116              | 7.325    | 0.056    |
| er    | 7.563         | 0.038         | -15.366            | 7.325    | 0.056    |
| ih    | 7.351         | 0.024         | -14.131            | 7.325    | 0.056    |
| iy    | 7.343         | 0.036         | -9.583             | 7.325    | 0.056    |
| oa    | 7.456         | 0.035         | -61.450            | 7.325    | 0.056    |
| oo    | 7.446         | 0.029         | -25.315            | 7.325    | 0.056    |
| uh    | 7.435         | 0.027         | -28.174            | 7.325    | 0.056    |
| uw    | 7.519         | 0.037         | -11.774            | 7.325    | 0.056    |
|       | prior_density |               |                    |          |          |
| ae    | 1.918         |               |                    |          |          |
| ah    | 1.918         |               |                    |          |          |
| aw    | 1.918         |               |                    |          |          |
| eh    | 1.918         |               |                    |          |          |
| ei    | 1.918         |               |                    |          |          |
| er    | 1.918         |               |                    |          |          |
| ih    | 1.918         |               |                    |          |          |
| iy    | 1.918         |               |                    |          |          |
| oa    | 1.918         |               |                    |          |          |
| oo    | 1.918         |               |                    |          |          |
| uh    | 1.918         |               |                    |          |          |
| uw    | 1.918         |               |                    |          |          |

The `get_winners` function returns the category with the highest posterior probability for each observation, and the corresponding estimate of  $\hat{\psi}_s$ .

```
get_winners(analysis)
```

|   | psi_hat  | vowel_hat |
|---|----------|-----------|
| 1 | 7.296313 | ae        |
| 2 | 7.302488 | ah        |
| 3 | 7.329890 | aw        |
| 4 | 7.284129 | eh        |
| 5 | 7.326943 | ei        |

And the `get_posterior` function returns the posterior probability for each category for each observation.

```
get_posterior (analysis)
```

|   | ae    | ah    | aw    | eh    | ei | er | ih | iy | oa | oo    | uh    | uw |
|---|-------|-------|-------|-------|----|----|----|----|----|-------|-------|----|
| 1 | 0.996 | 0.000 | 0.000 | 0.004 | 0  | 0  | 0  | 0  | 0  | 0.000 | 0.000 | 0  |
| 2 | 0.000 | 0.977 | 0.016 | 0.000 | 0  | 0  | 0  | 0  | 0  | 0.000 | 0.007 | 0  |
| 3 | 0.000 | 0.292 | 0.422 | 0.000 | 0  | 0  | 0  | 0  | 0  | 0.000 | 0.286 | 0  |

```

4 0.008 0.000 0.000 0.991 0 0 0 0 0 0.001 0.000 0
5 0.000 0.000 0.000 0.000 1 0 0 0 0 0.000 0.000 0

```

To use a different estimation method we use the method parameter in BSTM as shown below.

```

BSTM (ffs[1,],f0s[1], template = template, method = method2)
  posterior_mu posterior_sd posterior_density posterior_probability
rounded_pp
ae      7.287      0.026      2.729      0.997
0.997
ah      7.415      0.033     -24.208      0.000
0.000
aw      7.549      0.035     -54.280      0.000
0.000
eh      7.328      0.027      -3.117      0.003
0.003
ei      7.358      0.029     -27.036      0.000
0.000
er      7.634      0.038     -16.502      0.000
0.000
ih      7.352      0.024      -9.902      0.000
0.000
iy      7.231      0.036     -62.903      0.000
0.000
oa      7.512      0.035     -30.671      0.000
0.000
oo      7.425      0.029     -20.103      0.000
0.000
uh      7.404      0.027     -20.884      0.000
0.000
uw      7.508      0.037     -14.204      0.000
0.000
  likelihood_mu likelihood_sd likelihood_density prior_mu prior_sd
ae      7.287      0.026      11.044      NA      NA
ah      7.415      0.033     -15.894      NA      NA
aw      7.549      0.035     -45.966      NA      NA
eh      7.328      0.027      5.197      NA      NA
ei      7.358      0.029     -18.722      NA      NA
er      7.634      0.038      -8.187      NA      NA
ih      7.352      0.024      -1.587      NA      NA
iy      7.231      0.036     -54.588      NA      NA
oa      7.512      0.035     -22.356      NA      NA
oo      7.425      0.029     -11.789      NA      NA
uh      7.404      0.027     -12.570      NA      NA
uw      7.508      0.037      -5.889      NA      NA
  prior_density
ae      NA
ah      NA

```

|    |    |
|----|----|
| aw | NA |
| eh | NA |
| ei | NA |
| er | NA |
| ih | NA |
| iy | NA |
| oa | NA |
| oo | NA |
| uh | NA |
| uw | NA |

Note that the prior information is set to NA because this method places no a priori constraints on values of  $\hat{\psi}_s$ .

## Plotting

The package contains plotting functions defined for the `STM_template` and `STM_output_list` objects. The `plot` function for the `STM_template` object plots the means of the formant values for each category, and ellipses enclosing one and two standard deviations.

```
plot (template)
```

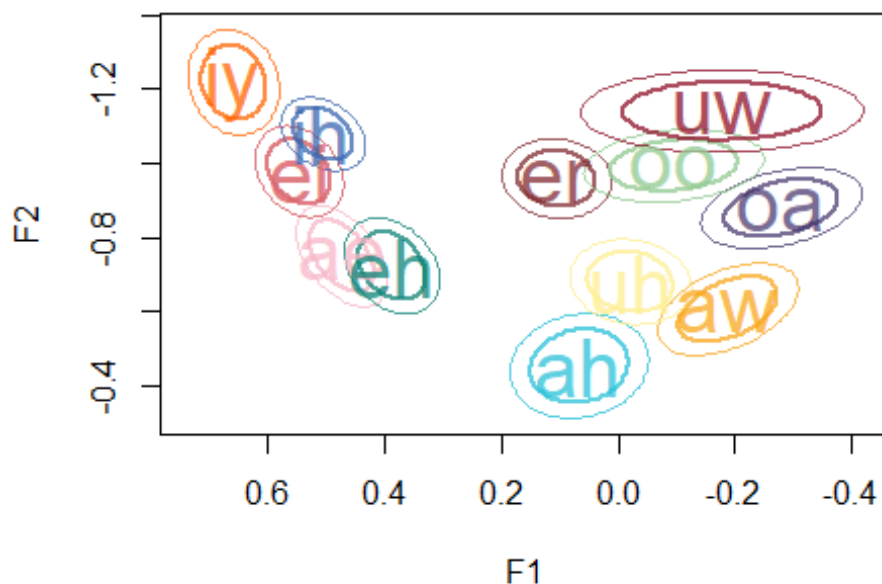

The `plot` function for `STM_output` objects compares the prior probabilities of  $\psi_s$ , the likelihood of the formant pattern given different values of  $\psi_s$  and different vowel categories, and the posterior probabilities of  $\psi_s$  for each category.



```
plot (analysis[[1]])
```

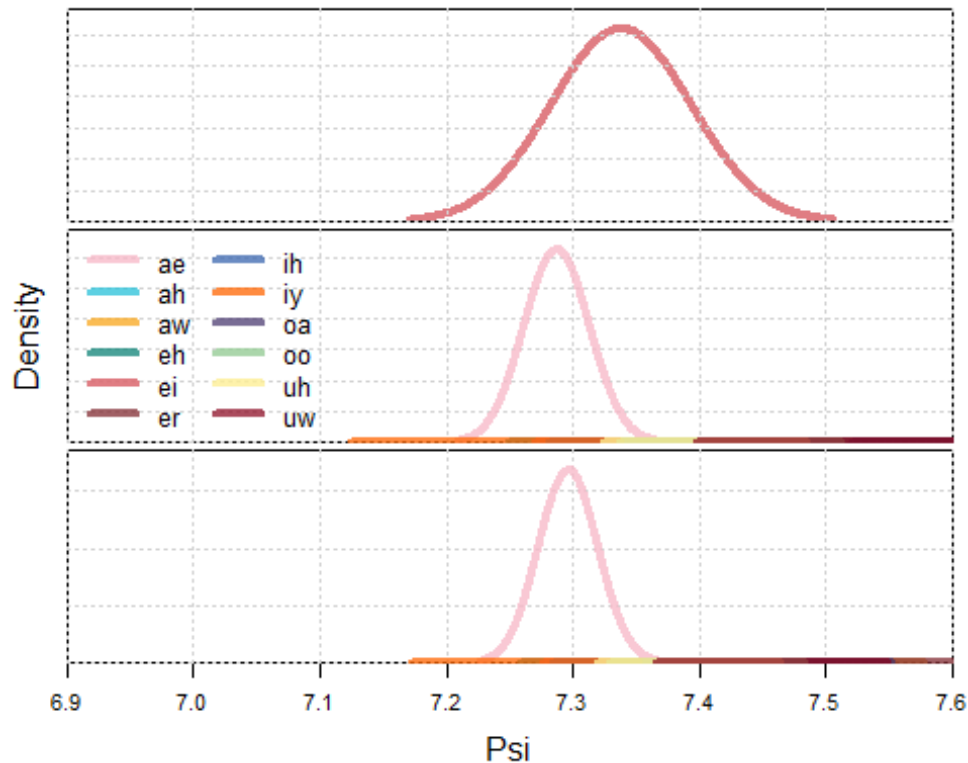

## Walkthrough of the the BSTM function

We will describe the sequence of steps underlying the BSTM function, relying on the steps carried out in section [?@sec-setup](#).

The BSTM function takes in a formant vector, an (optional depending on the metho) f0 value, and a template. It returns information regarding the posterior probabilities for each category, the likelihoods, and the priors.

```
BSTM (ffs[1,],f0s[1], template = template)
```

I am going to walk through the way this function works. BSTM and PSTM are basically a wrapper for the method functions in the estimation\_methods.R file. The method functions are the ones that actually calculate the likelihoods and priors. method6 implements the method 6 algorithm as seen below:

```
method6
```

```
function (ffs, f0, template, PSI_prior_mean = 7.233, PSI_prior_sd = 0.1284,
  f0_hat_sd = 0.1327, f0_hat_intercept = -10.32, f0_hat_slope = 2.145,
  vowel_priors = vowel_priors, correctOUflow = TRUE, type = "BSTM",
  ...)
{
  n_classes = nrow(template$means)
```

```

        likelihoods = t(sapply(1:n_classes, function(j) {
            estimate_likelihood(ffs, template$means[j, ],
template$covariance[[j]],
            template$precision[[j]]))
        )))
    rownames(likelihoods) = rownames(template$means)
    priors = estimate_f0_psi_prior(f0)
    priors = matrix(priors, n_classes, 3, byrow = TRUE)
    colnames(priors) = c("prior_mu", "prior_sd", "prior_density")
    if (!is.null(vowel_priors))
        priors$prior_density = priors$prior_density + log(vowel_priors)
    posterior = find_posterior(likelihoods, priors, type = type)
    if (correctOUflow)
        posterior[, 4] = correctOUflow_internal(posterior[, 4])
    stimulus = c(ffs, f0)
    parameters = c(PSI_prior_mean = PSI_prior_mean, PSI_prior_sd =
PSI_prior_sd,
        f0_hat_sd = f0_hat_sd, f0_hat_intercept = f0_hat_intercept,
        f0_hat_slope = f0_hat_slope)
    output = STM_output(cbind(posterior, likelihoods, priors),
        stimulus, template, parameters, vowel_priors)
    return(output)
}
<bytecode: 0x000002c76147e268>
<environment: namespace:STM>

```

The other methods (2 and 3) include subsets of the process above, so I will not go through method6. First, the `estimate_likelihood` function is called for each category. This function calculates the log likelihood of the formant vector given the category mean and covariance. This is done using the method in Terry's notes which yields the mean and standard deviation. The density at the mean is calculated using the density function. We will in general collect: the mu, the sd, the peak (log) density.

```

estimate_likelihood

function (ffs, means, covariance, precision = solve(covariance))
{
    intercept_template = sum(unlist(ffs - means) %*% precision)
    slope_template = -sum(precision)
    likelihood_mu = (-intercept_template/slope_template)
    likelihood_sd = sqrt(-1/slope_template)
    likelihood_density = dmvnorm_fast(ffs - likelihood_mu, means,
        covariance, log = TRUE)
    output = c(likelihood_mu = likelihood_mu, likelihood_sd = likelihood_sd,
        likelihood_density = likelihood_density)
    return(output)
}
<bytecode: 0x000002c761481f58>
<environment: namespace:STM>

```

We then calculate the joint prior pf  $\psi_s$  and  $f_0$  using the `estimate_f0_psi_prior` function. This function calculates the prior for the  $f_0$  value given the  $\psi$  value. The mean and sd are calculated the way described by our derivation. The main addition is that we find the value of the density at the prior mean.

```
estimate_f0_psi_prior
```

```
function (f0, PSI_prior_mean = 7.233, PSI_prior_sd = 0.1284,
  f0_hat_sd = 0.1327, f0_hat_intercept = -10.32, f0_hat_slope = 2.145,
  ...)
{
  intercept_f0_given_psi = ((f0_hat_slope * f0)/(f0_hat_sd^2) -
    (f0_hat_intercept * f0_hat_slope)/(f0_hat_sd^2))
  slope_f0_given_psi = ((-f0_hat_slope^2/(f0_hat_sd^2)))
  f0_given_psi_mu = (-intercept_f0_given_psi/slope_f0_given_psi)
  f0_given_psi_sd = sqrt(-1/slope_f0_given_psi)
  f0_hat = f0_hat_intercept + f0_hat_slope * f0_given_psi_mu
  f0_given_psi_density = stats::dnorm(f0, f0_hat, f0_hat_sd,
    log = TRUE)
  psi_prior_density = stats::dnorm(PSI_prior_mean, PSI_prior_mean,
    PSI_prior_sd, log = TRUE)
  prior_density = f0_given_psi_density * psi_prior_density
  tmp = combine_gaussians(f0_given_psi_mu, f0_given_psi_sd,
    PSI_prior_mean, PSI_prior_sd, f0_given_psi_density,
    psi_prior_density)
  output = c(prior_mu = tmp[1], prior_sd = tmp[2], prior_density = tmp[3])
  return(output)
}
<bytecode: 0x000002c76155f510>
<environment: namespace:STM>
```

We also call the `combine_gaussians` function which combines gaussian curves of any given peak density as follows:

```
combine_gaussians
```

```
function (mu_1, sd_1, mu_2, sd_2, d_1 = NULL, d_2 = NULL)
{
  if (is.null(d_1))
    d_1 = 1/(sqrt(2 * pi * sd_1^2))
  if (is.null(d_2))
    d_2 = 1/(sqrt(2 * pi * sd_2^2))
  mu = (mu_1/sd_1^2 + mu_2/sd_2^2)/(1/sd_1^2 + 1/sd_2^2)
  sd = sqrt(1/(1/sd_1^2 + 1/sd_2^2))
  d = dlike(mu, mu_1, sd_1, d_1, log = TRUE) + dlike(mu, mu_2,
    sd_2, d_2, log = TRUE)
  return(cbind(mu, sd, d))
}
<bytecode: 0x000002c761556b28>
<environment: namespace:STM>
```

Finally (in terms of important steps) we call the `find_posterior` function to combine our priors and likelihoods. This function simply combines the priors and likelihoods and then scales the posterior probabilities. by calling `scale_posterior`.

`find_posterior`

```
function (likelihoods, priors, type = "BSTM")
{
  n_vs = nrow(likelihoods)
  posterior = matrix(0, n_vs, 5, byrow = TRUE)
  posterior[, 1:3] = combine_gaussians(likelihoods[, 1], likelihoods[,
    2], priors[, 1], priors[, 2], likelihoods[, 3], priors[,
    3])
  posterior = scale_posterior(posterior, type = type)
  colnames(posterior) = c("posterior_mu", "posterior_sd",
"posterior_density",
  "posterior_probability", "rounded_pp")
  rownames(posterior) = rownames(likelihoods)
  return(posterior)
}
<bytecode: 0x000002c761571698>
<environment: namespace:STM>
```

The `scale_posterior` function scales the posterior probabilities to sum to 1. This is done by integration of the posterior distributions of  $\psi_s$  for each category and summing across all categories (if `type=BSTM`), or by exponentiating and summing posterior densities (if `type=PSTM`).

`scale_posterior`

```
function (posterior, type = "BSTM")
{
  if (type == "BSTM") {
    vowel_integrals = posterior[, 3] + log(posterior[, 2]) +
      (log(pi) + log(2)) * (0.5)
    log_sum_vowel_integrals = log(sum(exp(vowel_integrals)))
    posterior[, 3] = posterior[, 3] - log_sum_vowel_integrals
    posterior[, 4] = exp(vowel_integrals - log_sum_vowel_integrals)
  }
  if (type == "PSTM") {
    posterior[, 4] = exp(posterior[, 3])/sum(exp(posterior[,
      3]))
  }
  posterior[, 5] = round(posterior[, 4], 4)
  return(posterior)
}
<bytecode: 0x000002c76157a5b0>
<environment: namespace:STM>
```

## Comparison to Grid Search parameter estimation

As a sanity check we will compare the output of the BSTM function to the values we can calculate more directly using a grid search method. We use the same parameters as in methods 2, 3 and 6, and use the first observation from our data (any other can be used):

```
tmp_ffs = ffs[1,]
tmp_f0 = f0s[1]

psis = seq(6.8,7.6,.0001)
PSI_prior_mean = 7.233
PSI_prior_sd = 0.1284
f0_hat_sd = 0.1327
f0_hat_intercept = -10.32
f0_hat_slope = 2.145
```

To estimate the method 6 prior:

```
# psi prior normal density
psiprior = dnorm (psis,PSI_prior_mean,PSI_prior_sd)

# predicted f0 for each psi
f0_hat = f0_hat_intercept + f0_hat_slope*psis

# density of f0 given psi
f0_given_psi = dnorm (tmp_f0, f0_hat, f0_hat_sd)

# joint density of f0|psi and psi
prior = f0_given_psi * psiprior
```

And likelihood:

```
# matrix of formant vector, repeated
formant_matrix = matrix (unlist(tmp_ffs),length(psis),6,byrow=TRUE)

# matrix of candidate psis, repeated across columns
psi_matrix = matrix (unlist(psis),length(psis),6)

# for each category, density of pattern - psi candidate
v_likelihoods = matrix (0,length(psis),12)
for (i in 1:12)
  v_likelihoods[,i] =
    dmvnorm_fast(formant_matrix - psi_matrix,
                  unlist(template$means[i,]),
                  template$covariance[[i]])
```

The posterior (before scaling) is the product of the likelihood and the prior:

```
posterior = v_likelihoods * matrix (prior,length(psis),12)
```

We numerically estimate the integral of all posteriors and divide the densities by this number to scale the total integral across all categories to 1:

```
integrals = rep(0,12)
for (i in 1:12) integrals[i] = integrate_numerical (psis, posterior[,i])

posterior = posterior / sum(integrals)
```

And confirm that the total integral across categories is now 1:

```
integrals_posterior = rep(0,12)
for (i in 1:12) integrals_posterior[i] = integrate_numerical (psis,
posterior[,i])
sum (integrals_posterior)

[1] 1
```

We will compare to the output of the BSTM function:

```
BSTM_output = BSTM (tmp_ffs, tmp_f0, template = template)$df
t(BSTM_output[1,])
```

|                       | ae          |
|-----------------------|-------------|
| posterior_mu          | 7.29631335  |
| posterior_sd          | 0.02353500  |
| posterior_density     | 2.82624049  |
| posterior_probability | 0.99592058  |
| rounded_pp            | 0.99590000  |
| likelihood_mu         | 7.28726847  |
| likelihood_sd         | 0.02596349  |
| likelihood_density    | 11.04363315 |
| prior_mu              | 7.33799095  |
| prior_sd              | 0.05573306  |
| prior_density         | 1.82247956  |

The posterior mean corresponds to the MAP psi value:

```
BSTM_output[1,'posterior_mu']

[1] 7.296313

psis[which.max(posterior[,1])]

[1] 7.2963
```

the posterior probability corresponds well to the numerically estimated integral:

```
BSTM_output[1,'posterior_probability']

[1] 0.9959206

integrate_numerical(psis, posterior[,1])
```

```
[1] 0.9959206
```

The posterior sd corresponds to what we can estimate using the second derivative of the posterior density:

```
log_posterior <- log(posterior[,1])
log_posterior_dx = diff(log_posterior) / diff(psis)
log_posterior_dx_dx = mean (diff(log_posterior_dx) / diff(psis[-1]))
```

```
BSTM_output[1,'posterior_sd']
```

```
[1] 0.023535
```

```
sqrt (-1/log_posterior_dx_dx)
```

```
[1] 0.023535
```

and the maximum posterior log density also corresponds to our estimated value:

```
BSTM_output[1,'posterior_density']
```

```
[1] 2.82624
```

```
log(max(posterior[,1]))
```

```
[1] 2.82624
```

We can do the same estimates for our prior, seeing that these match our function outputs:

```
unlist(BSTM_output[1,9:11])
```

| prior_mu   | prior_sd   | prior_density |
|------------|------------|---------------|
| 7.33799095 | 0.05573306 | 1.82247956    |

```
psis[which.max(prior)]
```

```
[1] 7.338
```

```
log_prior <- log(prior)
log_prior_dx = diff(log_prior) / diff(psis)
log_prior_dx_dx = mean (diff(log_prior_dx) / diff(psis[-1]))
sqrt (-1/log_prior_dx_dx)
```

```
[1] 0.05573306
```

```
log(max(prior))
```

```
[1] 1.82248
```

and for our likelihood:

```
unlist(BSTM_output[1,6:8])
```

| likelihood_mu | likelihood_sd | likelihood_density |
|---------------|---------------|--------------------|
| 7.28726847    | 0.02596349    | 11.04363315        |

```

psis[which.max(v_likelihoods[,1])]
[1] 7.2873

log_likelihood <- log(v_likelihoods[,1])
log_likelihood_dx = diff(log_likelihood) / diff(psis)
log_likelihood_dx_dx = mean (diff(log_likelihood_dx) / diff(psis[-1]))
sqrt (-1/log_likelihood_dx_dx)

[1] 0.02596349

log(max(v_likelihoods[,1]))
[1] 11.04363

```

Q.E.D.!
